# Supplementary figures and images for: Arterial resection during pancreatectomy for pancreatic ductal adenocarcinoma with arterial invasion: A single-center experience with 109 patients
Source: PubMed Central journal article supplement — Medicine (Baltimore). 2020 Sep 11;99(37):e22115. doi: 10.1097/MD.0000000000022115 (PMC7489745; doi:10.1097/md.0000000000022115), 2020-09-11

**A**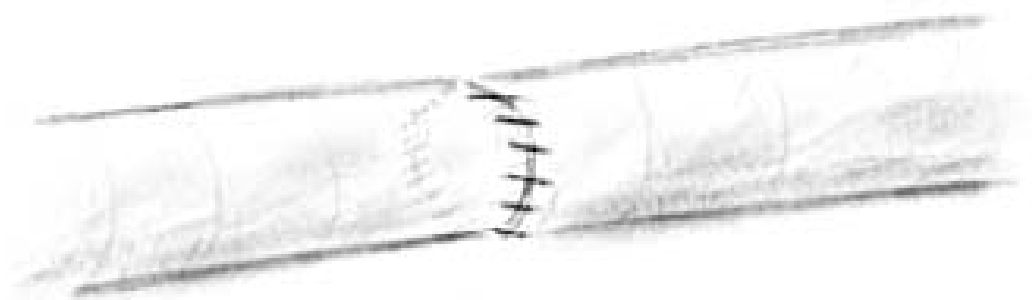**B**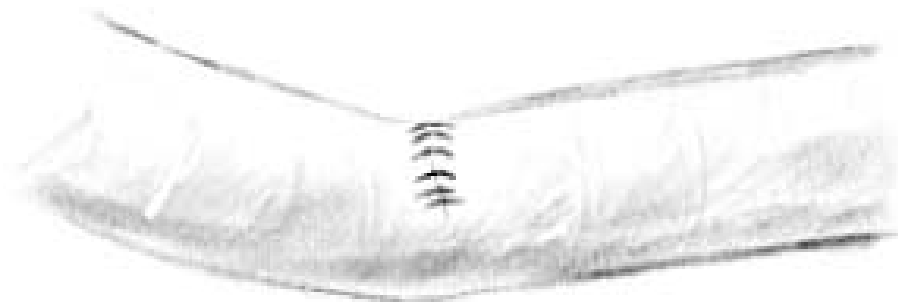**C**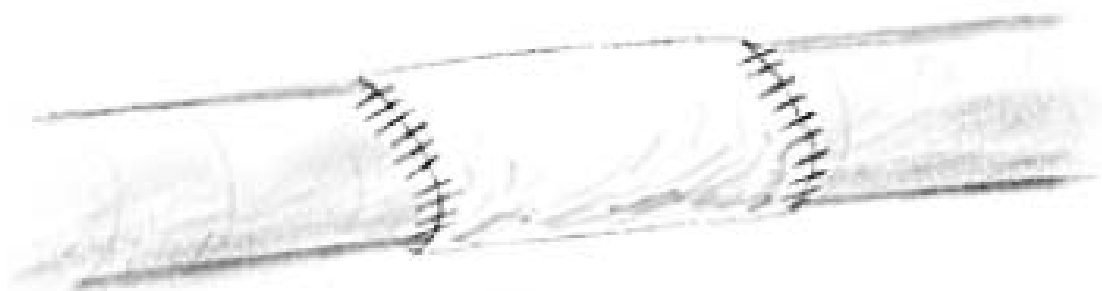**D**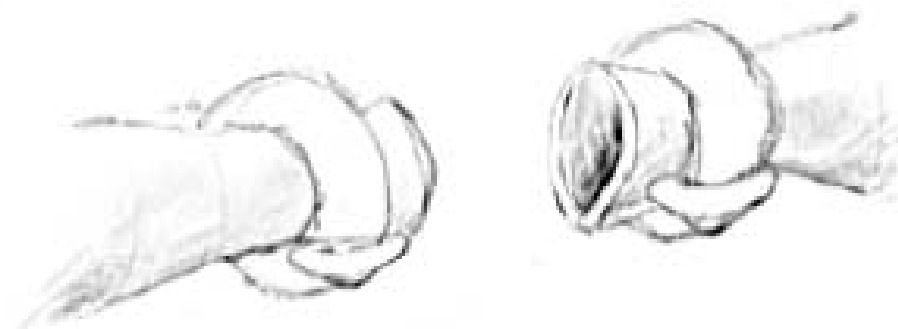

Supplement: medi-99-e22115-s002.pdf [file medi-99-e22115-s002.pdf]
